# Supplementary material
Source: PubMed Central journal article supplement (PMC8810731)
Supplement: NIHMS1756678-supplement-S1.pdf [file NIHMS1756678-supplement-S1.pdf]

**Supplemental Digital Content - Table S1. Medical equipment use before PICU admission and after PICU discharge (n = 958)**

| Type, n (%)                  | Equipment in Home <sup>a</sup><br>(n = 606) | Used Pre-PICU <sup>b</sup><br>(n = 253) | New Post-PICU <sup>c</sup><br>(n = 353) |
|------------------------------|---------------------------------------------|-----------------------------------------|-----------------------------------------|
| <b>Pulmonary</b>             |                                             |                                         |                                         |
| Nebulizer                    | 382 (40)                                    | 210 (22)                                | 172 (18)                                |
| Home oxygen                  | 107 (11)                                    | 61 (6)                                  | 46 (5)                                  |
| Pulse oximeter               | 87 (9)                                      | 51 (5)                                  | 36 (4)                                  |
| Suction                      | 82 (9)                                      | 53 (6)                                  | 29 (3)                                  |
| Cough assist                 | 35 (4)                                      | 16 (2)                                  | 19 (2)                                  |
| Vest airway clearance system | 30 (3)                                      | 17 (2)                                  | 13 (1)                                  |
| CPAP/BiPAP                   | 22 (2)                                      | 7 (<1)                                  | 15 (2)                                  |
| Tracheostomy                 | 21 (2)                                      | 4 (<1)                                  | 17 (2)                                  |
| Mechanical ventilation       | 21 (2)                                      | 4 (<1)                                  | 17 (2)                                  |
| Other                        | 25 (3)                                      | 9 (<1)                                  | 16 (2)                                  |
| <b>Nutrition</b>             |                                             |                                         |                                         |
| Feeding tube <sup>d</sup>    | 178 (19)                                    | 103 (11)                                | 75 (8)                                  |
| Tube feedings                | 139 (15)                                    | 82 (9)                                  | 57 (6)                                  |
| TPN                          | 10 (1)                                      | 4 (<1)                                  | 6 (<1)                                  |
| <b>Mobility</b>              |                                             |                                         |                                         |
| Wheelchair                   | 86 (9)                                      | 58 (6)                                  | 28 (3)                                  |
| Crutches/cane/walker         | 40 (4)                                      | 19 (2)                                  | 21 (2)                                  |
| Braces (back, arms, or legs) | 30 (3)                                      | 19 (2)                                  | 11 (1)                                  |
| Other                        | 23 (2)                                      | 19 (2)                                  | 4 (<1)                                  |
| Home IV                      | 56 (6)                                      | 17 (2)                                  | 39 (4)                                  |
| <b>Patient transfer</b>      |                                             |                                         |                                         |
| Hospital bed                 | 38 (4)                                      | 28 (3)                                  | 10 (1)                                  |
| Mechanical lift              | 19 (2)                                      | 14 (1)                                  | 5 (<1)                                  |
| Bathing/toileting            | 33 (3)                                      | 19 (2)                                  | 14 (1)                                  |

Abbreviations: CPAP/BIPAP, continuous positive airway pressure or bilevel positive airway pressure; TPN, total parenteral nutrition; IV, intravenous line.

<sup>a</sup> 63% of the study sample (606/958) were using at least one type of equipment within six months after discharge. 28% (273/958) were using more than one type of equipment.

<sup>b</sup> The column represents equipment that was used prior to the PICU admission and still in use six months after discharge.

<sup>c</sup> 37% of the study sample (n = 353/958) are using at least one piece of new equipment within six months after discharge.

<sup>d</sup> This includes subjects with feeding tubes placed, which could be used for feedings and/or medications. It is possible that a feeding tube is in place but is not being used
