# Supplementary material
Source: PubMed Central journal article supplement (PMC8810731)
Supplement: NIHMS1756678-supplement-S2.pdf [file NIHMS1756678-supplement-S2.pdf]

**Supplemental Digital Content - Table S2. Predictors of Health-Related Quality of Life (PedsQL) in Children Ages 2 - 17 Six Months After PICU Discharge (n = 398)**

| Covariates                                             | Total score<br>β (95% CI)    | Physical health<br>β (95% CI) | Psychosocial health<br>β (95% CI) | Emotional<br>functioning<br>β (95% CI) | Social<br>functioning<br>β (95% CI) | School<br>functioning<br>β (95% CI) |
|--------------------------------------------------------|------------------------------|-------------------------------|-----------------------------------|----------------------------------------|-------------------------------------|-------------------------------------|
| Income quartiles (ref = High)                          |                              |                               |                                   |                                        |                                     |                                     |
| Low                                                    | -4.0 (-9.8, 1.7)             | -2.6 (-9.7, 4.5)              | -4.8 (-10.7, 1.0)                 | -5.9 (-12.8, 1.1)                      | -3.4 (-10.6, 3.8)                   | -7.5 (-15.8, 0.9)                   |
| Low Middle                                             | -2.8 (-8.1, 2.4)             | -3.9 (-11.0, 3.2)             | -2.5 (-7.4, 2.4)                  | -3.3 (-9.6, 3.1)                       | -0.4 (-6.1, 5.3)                    | -8.6* <sup>†</sup> (-15.6, -1.6)    |
| High Middle                                            | -2.8 (-7.43, 1.7)            | -1.8 (-7.2, 3.5)              | -3.5 (-8.0, 1.1)                  | -6.0* <sup>†</sup> (-11.9, -0.2)       | -1.5 (-7.2, 4.2)                    | -4.2 (-10.3, 1.9)                   |
| Age at follow-up (ref = 2yr to <5yr)                   |                              |                               |                                   |                                        |                                     |                                     |
| 5yr to <8yr                                            | <b>-8.2* (-13.0, -3.3)</b>   | <b>-7.8* (-14.3, -1.2)</b>    | <b>-8.2** (-12.9, -3.5)</b>       | <b>-8.7** (-13.8, -3.5)</b>            | -4.9 (-10.3, -.6)                   | <b>-8.6* (-16.5, -0.7)</b>          |
| 8yr to <13yr                                           | <b>-12.9** (-20.0, -5.8)</b> | <b>-12.3* (-20.9, -3.7)</b>   | <b>-13.0** (-19.4, -6.6)</b>      | <b>-13.3** (-20.7, -5.8)</b>           | <b>-9.3* (-16.1, -2.5)</b>          | <b>-14.6** (-22.7, -6.6)</b>        |
| 13yr to < 17yr                                         | <b>-9.7** (-13.7, -5.6)</b>  | <b>-10.9** (-16.6, -5.2)</b>  | <b>-8.8** (-12.5, -5.1)</b>       | <b>-9.4** (-14.1, -4.7)</b>            | -3.7 (-8.2, 0.8)                    | <b>-11.6** (-18.4, -4.9)</b>        |
| Preexisting condition                                  | <b>-6.6** (-2.8, -10.5)</b>  | <b>-10.0** (-15.3, -4.7)</b>  | <b>-4.4* (-7.6, -1.2)</b>         | -0.6 (-4.3, 3.2)                       | <b>-5.7* (-10.0, -1.4)</b>          | <b>-8.2** (-13.0, -3.5)</b>         |
| PARDS on day 0/1 <sup>a</sup> (ref = at risk/mild)     |                              |                               |                                   |                                        |                                     |                                     |
| Moderate                                               | -2.4 (-6.8, 2.1)             | -2.8 (-7.8, 2.4)              | -2.6 (-7.4, 2.3)                  | -0.8 (-6.7, 5.0)                       | <b>-5.1* (-9.7, -0.6)</b>           | -0.4 (-7.8, 7.0)                    |
| Severe                                                 | -0.2 (-3.9, 3.6)             | 1.3 (-4.0, 6.6)               | -1.3 (-4.9, 2.2)                  | -1.4 (-5.2, 2.5)                       | -3.4 (-7.4, 0.7)                    | 2.3 (-3.4, 8.0)                     |
| Duration of mechanical ventilation, per day            | -0.02 (-0.4, 0.4)            | -0.2 (-0.6, 0.3)              | 0.08 (-0.3, 0.4)                  | 0.03 (-0.3, 0.4)                       | 0.2 (-0.3, 0.7)                     | 0.02 (-0.4, 0.5)                    |
| Organ system dysfunction <sup>b</sup>                  | -1.6 (-3.2, -0.1)            | -1.9 (-3.6, -0.2)             | -1.3 (-3.1, 0.4)                  | -0.5 (-2.9, 1.8)                       | -1.7 (-3.4, 0.04)                   | -2.3 (-4.4, -0.2)                   |
| Functional status at discharge (ref = age-appropriate) |                              |                               |                                   |                                        |                                     |                                     |
| Mild disability                                        | <b>-9.1* (-13.5, -4.6)</b>   | <b>-13.5** (-19.4, -7.6)</b>  | <b>-5.8* (10.4, -1.2)</b>         | -0.6 (-6.7, 5.5)                       | <b>-11.1** (-16.1, -6.1)</b>        | <b>-8.7* (-16.8, -0.5)</b>          |
| Moderate disability                                    | <b>-24.3* (-30.1, -18.5)</b> | <b>-36.2** (-44.5, -28.0)</b> | <b>-17.0** (-24.0, -10.0)</b>     | -1.6 (-7.9, 4.8)                       | <b>-29.0** (-36.3, -21.6)</b>       | <b>-23.4** (-34.1, -12.6)</b>       |
| Severe disability or vegetative state                  | -16.0 (-39.7, 7.6)           | -31.5 (-75.3, 12.3)           | -5.2 (-15.4, 4.9)                 | <b>10.8** (5.2, 16.3)</b>              | <b>-28.6* (-53.a, -4.1)</b>         | <b>21.8** (14.0, 29.7)</b>          |

Abbreviations: PICU, pediatric intensive care unit; CI, confidence interval; PARDS, pediatric acute respiratory distress syndrome.

Higher scores indicate better health-related quality of life.

\*  $P < .05$

\*\*  $P < .001$

<sup>a</sup> PARDS severity was defined using the 2015 Pediatric Acute Lung Injury Consensus Conference (PALICC) criteria. (33)

<sup>b</sup> Organ system dysfunction was measured continuously; every subject had respiratory dysfunction and dysfunction in up to five additional organ systems. (34)

<sup>†</sup> Small effect size  $d < 0.5$
